# Supplementary material
Source: Springer Nature journal article supplement (https://www.springermedizin.de/resource/supplementary/13032_2009_26_MOESM2_ESM.pdf/9651468)

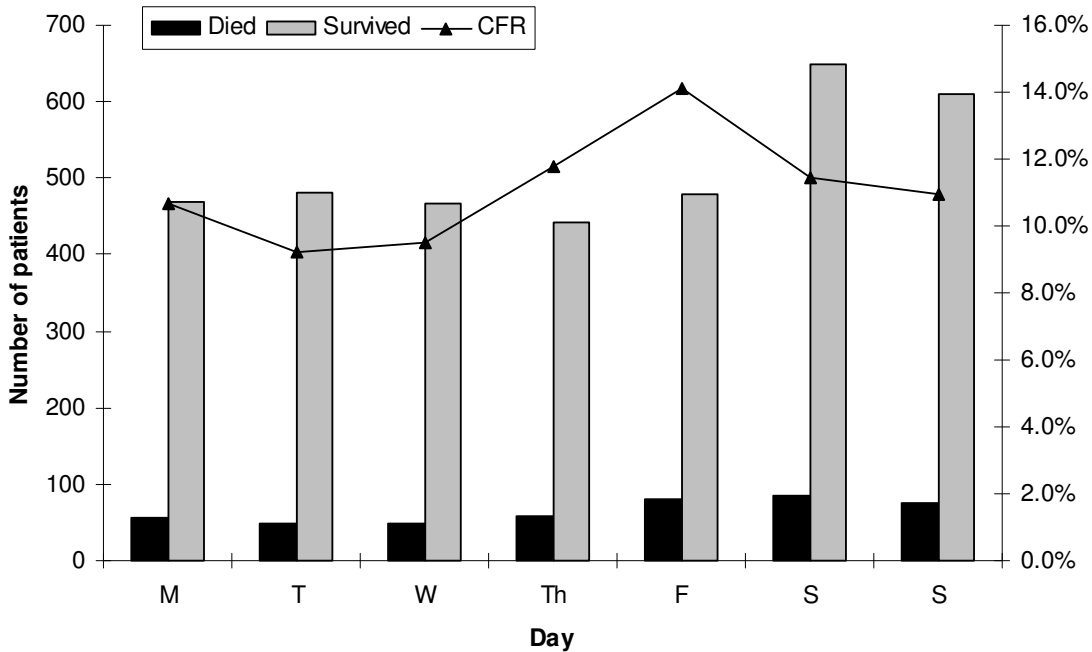

Supplement: MOESM2 [file 9651468]
